# Supplementary material for: Lytic Reactivation of the Kaposi’s Sarcoma-Associated Herpesvirus (KSHV) Is Accompanied by Major Nucleolar Alterations
Source: MDPI journal article supplement (doi:10.3390/v14081720), 2022-08-04
Supplement: s1 [file s1]

**Table S2. Complete stoichiometry of  $\Psi$  sites in BAC16-infected iSLK and SLK-uninfected cells that were treated with Dox and n-Butyrate for 48-hr, measured with HydraPsiSeq.** Data indicates the fraction pseudouridylated (PsiScore) measured in three replicates. Data are presented as mean +/- S.E.R. Highlighted in red are FC > 1.2 and highlighted in green are FC<0.8.

| rRNA | $\Psi$ site       | $\Psi$ -seq | HydraPsiSeq | Infected    | Uninfected  | Inf/Uninf |
|------|-------------------|-------------|-------------|-------------|-------------|-----------|
| SSU  | $\Psi$ 34         |             |             | 0.92+/-0.00 | 0.92+/-0.01 | 1.00      |
| SSU  | $\Psi$ 36         |             |             | 0.92+/-0.01 | 0.93+/-0.01 | 1.00      |
| SSU  | $\Psi$ 93         |             |             | 0.81+/-0.03 | 0.88+/-0.02 | 0.92      |
| SSU  | $\Psi$ 105        |             |             | 0.82+/-0.04 | 0.83+/-0.02 | 0.99      |
| SSU  | $\Psi$ 109        |             |             | 0.90+/-0.02 | 0.89+/-0.01 | 1.01      |
| SSU  | $\Psi$ 119        |             |             | 0.90+/-0.01 | 0.91+/-0.01 | 0.99      |
| SSU  | $\Psi$ 210        |             |             | 0.71+/-0.02 | 0.86+/-0.02 | 0.83      |
| SSU  | $\Psi$ 218        |             |             | 0.78+/-0.01 | 0.79+/-0.00 | 0.99      |
| SSU  | $\Psi$ 406        |             |             | 0.48+/-0.01 | 0.79+/-0.01 | 0.61      |
| SSU  | $\Psi$ 572        |             |             | 0.80+/-0.01 | 0.81+/-0.02 | 0.99      |
| SSU  | $\Psi$ 609        |             |             | 0.91+/-0.01 | 0.91+/-0.01 | 1.01      |
| SSU  | $\Psi$ 649        |             |             | 0.65+/-0.01 | 0.69+/-0.01 | 0.93      |
| SSU  | $\Psi$ 651        |             |             | 0.76+/-0.02 | 0.76+/-0.01 | 1.00      |
| SSU  | $\Psi$ 681        |             |             | 0.71+/-0.01 | 0.72+/-0.00 | 1.00      |
| SSU  | $\Psi$ 686        |             |             | 0.93+/-0.00 | 0.93+/-0.00 | 1.00      |
| SSU  | $\Psi$ 801        |             |             | 0.97+/-0.00 | 0.96+/-0.01 | 1.00      |
| SSU  | $\Psi$ 814        |             |             | 0.78+/-0.01 | 0.75+/-0.01 | 1.04      |
| SSU  | $\Psi$ 815        |             |             | 0.92+/-0.01 | 0.91+/-0.01 | 1.01      |
| SSU  | $\Psi$ 822        |             |             | 0.65+/-0.02 | 0.68+/-0.01 | 0.96      |
| SSU  | $\Psi$ 863        |             |             | 0.94+/-0.01 | 0.95+/-0.00 | 0.99      |
| SSU  | $\Psi$ 866        |             |             | 0.73+/-0.01 | 0.75+/-0.04 | 0.97      |
| SSU  | $\Psi$ 966 $\Psi$ |             |             | 0.96+/-0.00 | 0.96+/-0.00 | 1.00      |
| SSU  | $\Psi$ 1004       |             |             | 0.82+/-0.00 | 0.81+/-0.01 | 1.01      |
| SSU  | $\Psi$ 1056       |             |             | 0.93+/-0.01 | 0.93+/-0.01 | 0.99      |
| SSU  | $\Psi$ 1081       |             |             | 0.92+/-0.01 | 0.92+/-0.01 | 1.00      |
| SSU  | $\Psi$ 1174       |             |             | 0.91+/-0.00 | 0.91+/-0.00 | 1.01      |
| SSU  | $\Psi$ 1238       |             |             | 0.46+/-0.02 | 0.39+/-0.09 | 1.19      |
| SSU  | $\Psi$ 1244       |             |             | 0.98+/-0.00 | 0.99+/-0.00 | 1.00      |
| SSU  | $\Psi$ 1347       |             |             | 0.76+/-0.04 | 0.71+/-0.02 | 1.07      |
| SSU  | $\Psi$ 1367       |             |             | 0.74+/-0.02 | 0.73+/-0.01 | 1.01      |
| SSU  | $\Psi$ 1445       |             |             | 0.87+/-0.00 | 0.87+/-0.01 | 1.01      |
| SSU  | $\Psi$ 1625       |             |             | 0.90+/-0.00 | 0.90+/-0.01 | 1.00      |
| SSU  | $\Psi$ 1643       |             |             | 0.92+/-0.01 | 0.94+/-0.00 | 0.97      |
| SSU  | $\Psi$ 1692       |             |             | 0.87+/-0.01 | 0.86+/-0.00 | 1.00      |
| 5.8S | $\Psi$ 55         |             |             | 0.82+/-0.01 | 0.89+/-0.00 | 0.92      |
| 5.8S | $\Psi$ 69         |             |             | 0.93+/-0.00 | 0.93+/-0.00 | 1.00      |
| LSU  | $\Psi$ 1536       |             |             | 0.90+/-0.01 | 0.90+/-0.01 | 1.00      |

|     |       |       |       |             |             |      |
|-----|-------|-------|-------|-------------|-------------|------|
| LSU | Ψ1582 |       |       | 0.95+/-0.00 | 0.97+/-0.01 | 0.99 |
| LSU | Ψ1677 |       |       | 0.96+/-0.00 | 0.97+/-0.00 | 0.99 |
| LSU | Ψ1683 |       |       | 0.94+/-0.00 | 0.94+/-0.01 | 0.99 |
| LSU | Ψ1744 |       |       | 0.85+/-0.01 | 0.85+/-0.01 | 1.01 |
| LSU | Ψ1782 |       |       | 0.82+/-0.01 | 0.78+/-0.03 | 1.06 |
| LSU | Ψ1792 |       |       | 0.90+/-0.00 | 0.90+/-0.00 | 1.00 |
| LSU | Ψ1860 |       |       | 0.89+/-0.01 | 0.88+/-0.01 | 1.01 |
| LSU | Ψ1862 |       |       | 0.70+/-0.01 | 0.70+/-0.01 | 0.99 |
| LSU | Ψ2508 |       |       | 0.86+/-0.02 | 0.90+/-0.00 | 0.96 |
| LSU | Ψ3637 |       |       | 0.94+/-0.00 | 0.95+/-0.00 | 0.99 |
| LSU | Ψ3639 |       |       | 0.70+/-0.02 | 0.72+/-0.04 | 0.98 |
| LSU | Ψ3695 | Hyper |       | 0.80+/-0.01 | 0.82+/-0.01 | 0.98 |
| LSU | Ψ3715 |       |       | 0.95+/-0.00 | 0.95+/-0.00 | 1.00 |
| LSU | Ψ3758 | Hyper |       | 0.92+/-0.01 | 0.92+/-0.01 | 1.01 |
| LSU | Ψ3770 |       |       | 0.72+/-0.01 | 0.79+/-0.04 | 0.91 |
| LSU | Ψ3844 |       |       | 0.94+/-0.00 | 0.94+/-0.00 | 1.00 |
| LSU | Ψ3851 |       |       | 0.85+/-0.01 | 0.87+/-0.01 | 0.98 |
| LSU | Ψ3853 |       |       | 0.91+/-0.00 | 0.91+/-0.01 | 1.00 |
| LSU | Ψ3884 |       | Hypo  | 0.27+/-0.03 | 0.50+/-0.05 | 0.54 |
| LSU | Ψ3920 |       |       | 0.81+/-0.01 | 0.80+/-0.01 | 1.01 |
| LSU | Ψ3959 |       |       | 0.95+/-0.00 | 0.95+/-0.00 | 1.00 |
| LSU | Ψ4299 |       |       | 0.71+/-0.01 | 0.70+/-0.01 | 1.02 |
| LSU | Ψ4312 |       |       | 0.92+/-0.01 | 0.93+/-0.00 | 1.00 |
| LSU | Ψ4353 |       |       | 0.88+/-0.00 | 0.87+/-0.00 | 1.01 |
| LSU | Ψ4361 | hyper |       | 0.71+/-0.02 | 0.75+/-0.01 | 0.94 |
| LSU | Ψ4431 |       |       | 0.92+/-0.02 | 0.93+/-0.02 | 0.99 |
| LSU | Ψ4442 |       |       | 0.91+/-0.00 | 0.91+/-0.00 | 1.00 |
| LSU | Ψ4457 | hyper |       | 0.95+/-0.01 | 0.95+/-0.00 | 1.00 |
| LSU | Ψ4471 |       |       | 0.92+/-0.00 | 0.89+/-0.02 | 1.04 |
| LSU | Ψ4500 |       |       | 0.78+/-0.07 | 0.76+/-0.04 | 1.03 |
| LSU | Ψ4521 | hypo  |       | 0.98+/-0.02 | 1.00+/-0.00 | 0.98 |
| LSU | Ψ4532 |       |       | 0.94+/-0.00 | 0.94+/-0.02 | 1.00 |
| LSU | Ψ4552 |       |       | 0.94+/-0.01 | 0.94+/-0.01 | 1.00 |
| LSU | Ψ4576 |       |       | 0.80+/-0.01 | 0.79+/-0.03 | 1.01 |
| LSU | Ψ4579 |       |       | 0.75+/-0.01 | 0.78+/-0.01 | 0.96 |
| LSU | Ψ4628 |       |       | 0.74+/-0.02 | 0.72+/-0.01 | 1.02 |
| LSU | Ψ4636 | hypo  | Hyper | 0.24+/-0.04 | 0.18+/-0.08 | 1.35 |
| LSU | Ψ4673 |       |       | 0.81+/-0.01 | 0.78+/-0.01 | 1.04 |
| LSU | Ψ4689 | hypo  |       | 0.82+/-0.02 | 0.83+/-0.01 | 0.99 |
| LSU | Ψ4972 |       |       | 0.86+/-0.00 | 0.85+/-0.01 | 1.01 |
| LSU | Ψ4973 | Hyper | Hyper | 0.31+/-0.02 | 0.25+/-0.01 | 1.25 |
| LSU | Ψ5001 |       |       | 0.77+/-0.01 | 0.77+/-0.01 | 1.00 |
| LSU | Ψ5010 |       |       | 0.86+/-0.01 | 0.89+/-0.01 | 0.97 |
