# Supplementary material for: Lytic Reactivation of the Kaposi’s Sarcoma-Associated Herpesvirus (KSHV) Is Accompanied by Major Nucleolar Alterations
Source: MDPI journal article supplement (doi:10.3390/v14081720), 2022-08-04
Supplement: s1 [file s1]

**Table S3. Complete stoichiometry of 2'-O-methylation sites in BAC16-infected iSLK and SLK-uninfected cells that were treated with Dox and n-Butyrate for 48-hr, measured by RiboMeth-seq.** Data indicates the fraction methylated (Score-C) measured in three replicates. Data are presented as mean +/- S.E.R. The identity of Nm and the snoRNA assigned is indicated. Highlighted in red are FC > 1.2.

| Nm         | snoRNA         | Uninfected  | Infected    | Infected/Uninfected | Uninfed/Infected |
|------------|----------------|-------------|-------------|---------------------|------------------|
| SSU_Am27   | snoRD27        | 0.85+/-0.01 | 0.85+/-0.01 | 1.00                | 1.00             |
| SSU_Am99   | snoRD57        | 0.92+/-0.00 | 0.90+/-0.00 | 0.98                | 1.02             |
| SSU_Um116  | snoRD42        | 0.74+/-0.01 | 0.73+/-0.01 | 0.99                | 1.01             |
| SSU_Um121  | snoRD4A/B      | 0.78+/-0.01 | 0.77+/-0.00 | 0.99                | 1.01             |
| SSU_Am159  | snoRD45A/C     | 0.88+/-0.00 | 0.85+/-0.02 | 0.96                | 1.04             |
| SSU_Am166  | snoRD44        | 0.82+/-0.00 | 0.79+/-0.00 | 0.97                | 1.03             |
| SSU_Um172  | snoRD45A/B     | 0.68+/-0.01 | 0.64+/-0.03 | 0.93                | 1.08             |
| SSU_Cm174  | snoRD45C       | 0.41+/-0.08 | 0.33+/-0.07 | 0.79                | 1.26             |
| SSU_Um354  | snoRD90        | 0.33+/-0.01 | 0.28+/-0.03 | 0.84                | 1.18             |
| SSU_Um428  | snoRD68        | 0.74+/-0.04 | 0.74+/-0.03 | 1.00                | 1.00             |
| SSU_Gm436  | snoRD100       | 0.63+/-0.01 | 0.58+/-0.03 | 0.92                | 1.09             |
| SSU_Cm462  | snoRD14A/B/CDE | 0.54+/-0.03 | 0.58+/-0.03 | 1.06                | 0.95             |
| SSU_Am468  | snoRD83A       | 0.84+/-0.01 | 0.83+/-0.00 | 0.99                | 1.01             |
| SSU_Am484  | snoRD16        | 0.94+/-0.00 | 0.94+/-0.01 | 1.00                | 1.00             |
| SSU_Gm509  | snoRD11/B      | 0.88+/-0.01 | 0.86+/-0.01 | 0.98                | 1.02             |
| SSU_Am512  | snoRD70        | 0.77+/-0.02 | 0.75+/-0.03 | 0.98                | 1.02             |
| SSU_Cm517  | snoRD56/B      | 0.89+/-0.01 | 0.88+/-0.01 | 0.99                | 1.01             |
| SSU_Am576  | snoRD93        | 0.82+/-0.01 | 0.83+/-0.01 | 1.01                | 0.99             |
| SSU_Am590  | snoRD62A/B     | 0.53+/-0.02 | 0.55+/-0.03 | 1.04                | 0.97             |
| SSU_Um627  | snoRD65        | 0.44+/-0.01 | 0.40+/-0.06 | 0.90                | 1.11             |
| SSU_Gm644  | snoRD54        | 0.82+/-0.01 | 0.82+/-0.02 | 1.00                | 1.00             |
| SSU_Am668  | snoRD36A/B     | 0.81+/-0.01 | 0.83+/-0.02 | 1.03                | 0.97             |
| SSU_Gm683  | snoRD19/B      | 0.79+/-0.01 | 0.77+/-0.02 | 0.97                | 1.03             |
| SSU_Cm797  | snoRDZL107?    | 0.31+/-0.02 | 0.29+/-0.01 | 0.92                | 1.09             |
| SSU_Um799  | snoRD105/B     | 0.39+/-0.03 | 0.41+/-0.10 | 1.05                | 0.95             |
| SSU_Gm867  | snoRD98        | 0.66+/-0.01 | 0.61+/-0.01 | 0.92                | 1.09             |
| SSU_Am1031 | snoRD59A/B     | 0.92+/-0.01 | 0.92+/-0.00 | 1.01                | 0.99             |
| SSU_Cm1272 | snoRD66        | 0.72+/-0.00 | 0.71+/-0.02 | 0.98                | 1.02             |
| SSU_Um1288 | snoRD110       | 0.89+/-0.01 | 0.88+/-0.01 | 0.99                | 1.01             |
| SSU_Um1326 | snoRD33        | 0.59+/-0.03 | 0.62+/-0.02 | 1.04                | 0.96             |
| SSU_Am1383 | snoRD30?       | 0.89+/-0.00 | 0.89+/-0.00 | 1.00                | 1.00             |
| SSU_Cm1391 | snoRD28        | 0.80+/-0.01 | 0.80+/-0.02 | 1.00                | 1.00             |
| SSU_Um1442 | snoRD61        | 0.74+/-0.03 | 0.70+/-0.02 | 0.94                | 1.06             |
| SSU_Gm1447 | snoRD127       | 0.48+/-0.02 | 0.45+/-0.04 | 0.94                | 1.07             |
| SSU_Gm1490 | snoRD25        | 0.85+/-0.00 | 0.84+/-0.01 | 0.99                | 1.01             |
| SSU_Am1678 | snoRD82        | 0.62+/-0.04 | 0.65+/-0.03 | 1.05                | 0.95             |
| SSU_Cm1703 | snoRD43        | 0.43+/-0.01 | 0.42+/-0.03 | 0.99                | 1.01             |
| SSU_Um1804 | snoRD20        | 0.87+/-0.01 | 0.85+/-0.03 | 0.98                | 1.02             |

|            |                    |             |             |      |      |
|------------|--------------------|-------------|-------------|------|------|
| 5.8S_Um14  | snoRD71            | 0.32+/-0.04 | 0.23+/-0.05 | 0.71 | 1.42 |
| 5.8S_Gm75  | snoRD96A/B         | 0.42+/-0.04 | 0.46+/-0.03 | 1.10 | 0.91 |
| LSU_Am398  | snoRD26            | 0.32+/-0.05 | 0.38+/-0.04 | 1.20 | 0.83 |
| LSU_Am400  | snoRD81            | 0.68+/-0.02 | 0.69+/-0.02 | 1.01 | 0.99 |
| LSU_Gm1316 | snoRD21            | 0.45+/-0.03 | 0.40+/-0.03 | 0.88 | 1.13 |
| LSU_Am1323 | snoRD126?          | 0.70+/-0.02 | 0.68+/-0.03 | 0.97 | 1.03 |
| LSU_Am1326 | snoRD18A/B/C       | 0.90+/-0.00 | 0.90+/-0.00 | 1.00 | 1.00 |
| LSU_Cm1340 | snoRD104           | 0.55+/-0.01 | 0.56+/-0.02 | 1.02 | 0.98 |
| LSU_Gm1522 | snoRD2             | 0.90+/-0.01 | 0.90+/-0.00 | 1.00 | 1.00 |
| LSU_Am1524 | snoRD32A/B/snoRD51 | 0.55+/-0.05 | 0.53+/-0.06 | 0.97 | 1.03 |
| LSU_Am1534 | snoRD77/snoRD80    | 0.85+/-0.01 | 0.85+/-0.01 | 1.00 | 1.00 |
| LSU_Gm1625 | snoRD80            | 0.60+/-0.04 | 0.60+/-0.05 | 1.01 | 0.99 |
| LSU_Gm1760 | snoRD73A           | 0.52+/-0.04 | 0.51+/-0.05 | 0.97 | 1.03 |
| LSU_Am1871 | snoRD38A/B         | 0.95+/-0.00 | 0.95+/-0.00 | 0.99 | 1.01 |
| LSU_Cm1881 | snoRD48?           | 0.49+/-0.03 | 0.48+/-0.03 | 0.97 | 1.04 |
| LSU_Cm2351 | snoRD24            | 0.61+/-0.01 | 0.61+/-0.01 | 0.99 | 1.01 |
| LSU_Am2363 | snoRD76            | 0.69+/-0.01 | 0.68+/-0.03 | 0.99 | 1.01 |
| LSU_Gm2364 | snoRD_Unknown      | 0.50+/-0.02 | 0.49+/-0.07 | 0.98 | 1.02 |
| LSU_Am2401 | snoRD68            | 0.68+/-0.01 | 0.63+/-0.02 | 0.92 | 1.09 |
| LSU_Um2415 | snoRD143/144?      | 0.57+/-0.02 | 0.57+/-0.03 | 1.00 | 1.00 |
| LSU_Cm2422 | snoRD5             | 0.54+/-0.02 | 0.56+/-0.02 | 1.03 | 0.97 |
| LSU_Gm2424 | snoRD6             | 0.92+/-0.00 | 0.91+/-0.00 | 0.99 | 1.01 |
| LSU_Am2787 | snoRD99            | 0.69+/-0.01 | 0.66+/-0.02 | 0.96 | 1.05 |
| LSU_Cm2804 | snoRD55            | 0.71+/-0.01 | 0.66+/-0.02 | 0.94 | 1.07 |
| LSU_Am2815 | snoRD95            | 0.79+/-0.01 | 0.81+/-0.01 | 1.02 | 0.98 |
| LSU_Cm2824 | snoRD95            | 0.24+/-0.08 | 0.34+/-0.09 | 1.42 | 0.71 |
| LSU_Um2837 | snoRD34            | 0.72+/-0.02 | 0.75+/-0.03 | 1.04 | 0.96 |
| LSU_Cm2861 | snoRD50A/B         | 0.84+/-0.02 | 0.83+/-0.02 | 0.99 | 1.01 |
| LSU_Gm2876 | snoRD50A/B         | 0.72+/-0.03 | 0.69+/-0.03 | 0.97 | 1.04 |
| LSU_Cm3701 | snoRD88A/B/C       | 0.84+/-0.00 | 0.84+/-0.01 | 1.00 | 1.00 |
| LSU_Am3718 | snoRD37            | 0.87+/-0.01 | 0.85+/-0.01 | 0.97 | 1.03 |
| LSU_Am3724 | snoRD36C           | 0.91+/-0.00 | 0.90+/-0.01 | 0.99 | 1.01 |
| LSU_Gm3744 | snoRD87            | 0.63+/-0.02 | 0.60+/-0.01 | 0.94 | 1.06 |
| LSU_Am3760 | snoRD46            | 0.77+/-0.01 | 0.79+/-0.00 | 1.03 | 0.97 |
| LSU_Am3785 | snoRD15A/B         | 0.71+/-0.01 | 0.70+/-0.01 | 0.98 | 1.02 |
| LSU_Gm3792 | snoRD15A/B         | 0.85+/-0.00 | 0.85+/-0.00 | 0.99 | 1.01 |
| LSU_Cm3808 | snoRD10            | 0.82+/-0.02 | 0.81+/-0.01 | 0.99 | 1.01 |
| LSU_Um3818 | snoRD17            | 0.64+/-0.02 | 0.65+/-0.00 | 1.01 | 0.99 |
| LSU_Am3825 | snoRD30            | 0.81+/-0.01 | 0.82+/-0.01 | 1.01 | 0.99 |
| LSU_Am3830 | snoRD79            | 0.71+/-0.01 | 0.71+/-0.01 | 1.00 | 1.00 |
| LSU_Cm3841 | snoRD74            | 0.38+/-0.01 | 0.39+/-0.01 | 1.03 | 0.97 |
| LSU_Am3867 | snoRD92            | 0.71+/-0.01 | 0.68+/-0.00 | 0.95 | 1.05 |
| LSU_Cm3887 | snoRD47            | 0.63+/-0.02 | 0.65+/-0.04 | 1.03 | 0.97 |
| LSU_Gm3899 | snoRD12/B/SNORA45  | 0.58+/-0.02 | 0.60+/-0.01 | 1.03 | 0.97 |
| LSU_Um3925 | snoRD52            | 0.70+/-0.01 | 0.69+/-0.02 | 0.99 | 1.01 |
| LSU_Gm3944 | snoRD111/B         | 0.85+/-0.01 | 0.84+/-0.01 | 0.99 | 1.01 |

|            |               |             |             |      |      |
|------------|---------------|-------------|-------------|------|------|
| LSU_Gm4042 | snoRD102      | 0.79+/-0.02 | 0.76+/-0.02 | 0.96 | 1.04 |
| LSU_Cm4054 | snoRD75       | 0.20+/-0.00 | 0.24+/-0.03 | 1.16 | 0.86 |
| LSU_Um4227 | snoRD_Unknown | 0.78+/-0.01 | 0.78+/-0.02 | 1.00 | 1.00 |
| LSU_Gm4228 | snoRD58A/B/C  | 0.70+/-0.02 | 0.71+/-0.03 | 1.01 | 0.99 |
| LSU_Um4306 | snoRD41       | 0.54+/-0.03 | 0.50+/-0.01 | 0.92 | 1.08 |
| LSU_Gm4370 | snoRD60       | 0.79+/-0.02 | 0.80+/-0.01 | 1.01 | 0.99 |
| LSU_Gm4392 | snoRD1A/B/C   | 0.31+/-0.03 | 0.34+/-0.01 | 1.11 | 0.90 |
| LSU_Cm4456 | snoRD49A/B    | 0.57+/-0.03 | 0.60+/-0.01 | 1.06 | 0.94 |
| LSU_Gm4494 | snoRD69       | 0.93+/-0.01 | 0.92+/-0.01 | 0.98 | 1.02 |
| LSU_Um4498 | snoRD62AB     | 0.90+/-0.01 | 0.89+/-0.02 | 0.99 | 1.01 |
| LSU_Gm4499 | snoRD75/hSbp1 | 0.87+/-0.01 | 0.87+/-0.02 | 1.01 | 0.99 |
| LSU_Am4523 | snoRD29       | 0.93+/-0.02 | 0.94+/-0.02 | 1.01 | 0.99 |
| LSU_Cm4536 | snoRD35A/B    | 0.91+/-0.00 | 0.91+/-0.00 | 1.00 | 1.00 |
| LSU_Am4571 | snoRD63       | 0.49+/-0.03 | 0.53+/-0.02 | 1.08 | 0.92 |
| LSU_Am4590 | snoRD119      | 0.21+/-0.03 | 0.27+/-0.03 | 1.29 | 0.78 |
| LSU_Um4620 | snoRD72       | 0.78+/-0.02 | 0.79+/-0.02 | 1.01 | 0.99 |
| LSU_Gm4623 | snoRD78       | 0.60+/-0.04 | 0.65+/-0.01 | 1.08 | 0.93 |
| LSU_Gm4637 | snoRD121A/B   | 0.49+/-0.03 | 0.52+/-0.00 | 1.07 | 0.93 |
