# Supplementary material for: Lytic Reactivation of the Kaposi’s Sarcoma-Associated Herpesvirus (KSHV) Is Accompanied by Major Nucleolar Alterations
Source: MDPI journal article supplement (doi:10.3390/v14081720), 2022-08-04
Supplement: s1 [file s1]

**Table S1: The fold-change of  $\Psi$ s in BAC16-infected iSLK/SLK-uninfected cells based on  $\Psi$ -seq for rRNA.  $\Psi$ -fc(log2) across four independent biological replicates for pseudouridylated sites was calculated for all  $\Psi$ s.  $\Psi$ -fc(log2) >1.3 (iSLK/SLK-infected/SLK-uninfected cells that were treated with Dox and n-Butyrate for 48-hr) in at least two independent replicates was considered as hypermodified  $\Psi$ . Hypermodified and hypomodified  $\Psi$  site is highlighted in red and blue, respectively. snoRNAs predicted to guide the corresponding  $\Psi$  positions are indicated on the right column.**

| rRNA nt   | Rep1     | Rep2     | Rep3     | Rep4       | snoRNA                   |
|-----------|----------|----------|----------|------------|--------------------------|
| SSU_U34   | 1.468669 | 0.988429 | 1.016245 | 1.0403557  | SNORA76,ACA50,ACA62      |
| SSU_U36   | 1.275819 | 0.978157 | 0.982736 | 0.9588488  | SNORA69,ACA55            |
| SSU_U93   | 1.099105 | 0.944583 | 1.019327 | 1.07740026 | U23                      |
| SSU_U105  | 1.056816 | 1.138757 | 1.010098 | 1.01779137 | ACA36,ACA36B,ACA50,ACA62 |
| SSU_U109  | 0.958792 | 1.042759 | 0.992208 | 0.98786735 | ACA42,ACA67              |
| SSU_U119  | 0.944141 | 1.057933 | 1.017579 | 1.00344013 | U66                      |
| SSU_U210  | 1.026285 | 0.972761 | 0.940047 | 0.91496893 | ACA10                    |
| SSU_U218  | 0.95014  | 1.104273 | 1.01207  | 0.9916505  | ACA31                    |
| SSU_U406  | 1.037276 | 0.932315 | 0.806816 | 0.7737492  | U71A,U71B,U71C,U71D      |
| SSU_U572  | 1.528347 | 0.908834 | 1.061888 | 1.03883899 | ACA42,ACA67              |
| SSU_U609  | 0.976955 | 0.787425 | 0.974681 | 1.02709885 | ACA24                    |
| SSU_U649  | 0.90031  | 0.928624 | 0.991253 | 1.05550498 | ACA46                    |
| SSU_U651  | 0.851527 | 0.92517  | 0.959638 | 0.97462104 | ACA20                    |
| SSU_U681  | 0.988441 | 1.028319 | 1.01359  | 1.01117064 | snoRNA unknown           |
| SSU_U686  | 0.983084 | 1.169573 | 1.041192 | 1.01330469 | ACA44                    |
| SSU_U688  | 0.410803 | 1.282688 | 1.162695 | 1.0231748  | snoRNA unknown           |
| SSU_U801  | 1.192798 | 1.879668 | 1.391255 | 1.84843555 | ACA25                    |
| SSU_U814  | 1.301894 | 1.249537 | 0.94978  | 1.14805065 | ACA25,ACA63              |
| SSU_U815  | 1.067229 | 1.203814 | 0.99798  | 1.12746768 | ACA28                    |
| SSU_U822  | 1.088918 | 1.131746 | 0.957709 | 0.99410917 | ACA44                    |
| SSU_U863  | 1.00613  | 1.06618  | 0.974364 | 0.99931232 | ACA24,ACA19              |
| SSU_U866  | 1.046548 | 1.210732 | 0.963384 | 0.96172145 | ACA28                    |
| SSU_U918  | 1.00129  | 1.018347 | 0.967732 | 0.94996017 | snoRNA unknown           |
| SSU_U966  | 1.330202 | 0.942089 | 1.013156 | 1.01581904 | ACA14A,ACA14B            |
| SSU_U1004 | 1.277082 | 0.943282 | 0.98685  | 1.04744811 | ACA60,U99                |
| SSU_U1046 | 1.015978 | 1.083074 | 0.932534 | 0.93249117 | SNORA57                  |
| SSU_U1056 | 0.909807 | 1.011326 | 0.949366 | 0.92484548 | ACA8                     |
| SSU_U1081 | 0.940439 | 1.079035 | 1.037986 | 0.98696823 | ACA8                     |
| SSU_U1174 | 1.340738 | 1.150772 | 1.085431 | 0.9936383  | ACA40                    |

|           |          |          |          |            |                  |
|-----------|----------|----------|----------|------------|------------------|
| SSU_U1232 | 1.53262  | 0.979777 | 0.990108 | 0.94861696 | SNORA70          |
| SSU_U1238 | 1.065837 | 0.976392 | 0.975618 | 0.94438083 | ACA5,ACA5B,ACA5C |
| SSU_U1244 | 0.862168 | 0.896855 | 0.97051  | 0.92693884 | ACA36,ACA36B     |
| SSU_U1248 | 1.242728 | 1.319133 | 0.751925 | 1.05759584 | snoRNA unknown   |
| SSU_U1347 | 0.8947   | 1.010253 | 0.99461  | 0.96687904 | ACA4             |
| SSU_U1367 | 0.93724  | 1.007698 | 0.994713 | 0.96560847 | ACA15            |
| SSU_U1445 | 0.850474 | 1.061705 | 1.03003  | 0.98349969 | U67              |
| SSU_U1625 | 1.275494 | 0.996099 | 0.937041 | 0.93372329 | ACA5,ACA5C       |
| SSU_U1643 | 1.000436 | 1.015723 | 0.961973 | 0.93720913 | ACA41            |
| SSU_U1692 | 0.98724  | 1.067176 | 0.955667 | 0.92945285 | U70              |
| 5.8S_55   | 1.182568 | 1.039824 | 0.934179 | 0.91165603 | SNORA72          |
| 5.8S_69   | 0.988129 | 0.96164  | 0.937108 | 0.88855944 | SNORA69          |
| LSU_U1536 | 0.966016 | 1.111709 | 0.982228 | 1.00161719 | snoRNA unknown   |
| LSU_U1582 | 1.084155 | 1.011051 | 0.996068 | 0.94525012 | ACA7, ACA7B      |
| LSU_U1677 | 1.485157 | 1.126585 | 1.057221 | 1.00534307 | ACA56            |
| LSU_U1683 | 1.309181 | 1.104935 | 1.063947 | 0.9922291  | ACA9             |
| LSU_U1744 | 1.223034 | 1.036014 | 0.906133 | 1.02972517 | ACA52            |
| LSU_U1779 | 1.292554 | 1.032532 | 0.901382 | 0.97947874 | HBII-115         |
| LSU_U1781 | 1.078263 | 1.030057 | 0.959138 | 0.97924746 | ACA9             |
| LSU_U1782 | 0.991141 | 1.015936 | 0.956222 | 0.95063689 | ACA9             |
| LSU_U1792 | 0.967819 | 1.013244 | 1.002851 | 0.98240009 | ACA7, ACA7B      |
| LSU_U1860 | 0.889636 | 1.019725 | 0.96528  | 0.95628518 | ACA32            |
| LSU_U1862 | 0.926729 | 1.018165 | 0.967578 | 0.94911702 | snoRNA unknown   |
| LSU_U2508 | 0.951663 | 1.037587 | 0.956109 | 0.93468343 | ACA61            |
| LSU_U3637 | 1.309204 | 0.782507 | 1.026932 | 0.97110373 | ACA6             |
| LSU_U3639 | 1.181594 | 0.899537 | 0.985241 | 0.94431825 | ACA19            |
| LSU_U3695 | 2.510632 | 1.421922 | 1.284121 | 1.330352   | snoRNA unknown   |
| LSU_U3715 | 5.770515 | 1.177458 | 1.141487 | 1.18871625 | ACA27            |
| LSU_U3730 | 3.576034 | 0.680195 | 0.894263 | 1.21109009 | ACA19            |
| LSU_U3734 | 1.446389 | 0.961407 | 0.908394 | 1.27862468 | ACA31            |
| LSU_U3758 | 4.965276 | 0.697585 | 0.980522 | 1.34410917 | ACA23            |
| LSU_U3762 | 3.587036 | 0.902314 | 0.875374 | 1.19874955 | SNORA74A/U19     |
| LSU_U3764 | 1.803594 | 0.826159 | 0.947037 | 1.16887906 | SNORA74A/U19     |
| LSU_U3768 | 2.695983 | 0.991671 | 0.951086 | 1.05243877 | snoRNA unknown   |
| LSU_U3770 | 1.496666 | 0.912813 | 0.936581 | 1.01472718 | snoRNA unknown   |
| LSU_U3818 | 1.390499 | 0.976433 | 0.959889 | 1.18033777 | ACA48            |
| LSU_U3822 | 0.999036 | 0.927757 | 0.96037  | 1.010826   | ACA54            |
| LSU_U3844 | 0.977596 | 0.941236 | 1.004998 | 1.01181004 | ACA58            |
| LSU_U3851 | 0.848792 | 0.906246 | 1.019531 | 1.00805085 | E2               |
| LSU_U3853 | 0.904676 | 1.000532 | 0.992033 | 0.97002858 | E2, ACA8         |
| LSU_U3884 | 0.87261  | 0.902521 | 0.868072 | 0.83824381 | snoRNA unknown   |

|           |          |          |          |            |                     |
|-----------|----------|----------|----------|------------|---------------------|
| LSU_U3920 | 0.93123  | 1.002363 | 0.966828 | 0.94316073 | ACA3                |
| LSU_U3959 | 0.904123 | 0.95046  | 0.999773 | 0.97324626 | ACA3                |
| LSU_U4293 | 1.121473 | 1.39007  | 1.095195 | 1.26083229 | ACA2A, ACA2B        |
| LSU_U4296 | 0.930936 | 1.121679 | 1.038018 | 1.18889835 | snoRNA unknown      |
| LSU_U4299 | 1.10639  | 1.181932 | 1.043949 | 1.10327164 | ACA34               |
| LSU_U4312 | 1.031484 | 1.176532 | 1.082566 | 1.17493999 | ACA2A, ACA2B, ACA34 |
| LSU_U4353 | 1.802119 | 1.250948 | 1.000483 | 1.02324973 | snoRNA unknown      |
| LSU_U4361 | 3.084676 | 1.329436 | 0.970958 | 1.02449057 | ACA23, ACA64        |
| LSU_U4403 | 1.648628 | 1.266701 | 0.934543 | 1.04975798 | U65                 |
| LSU_U4420 | 1.161879 | 1.128314 | 0.935576 | 1.04606126 | E3                  |
| LSU_U4423 | 1.033944 | 1.099944 | 0.933618 | 0.96002482 | U68                 |
| LSU_U4431 | 1.317962 | 1.207801 | 0.916385 | 0.94074434 | ACA21               |
| LSU_U4442 | 1.443502 | 1.126367 | 0.948953 | 0.97953338 | ACA16               |
| LSU_U4457 | 1.444627 | 1.970362 | 0.87465  | 0.9030562  | U65                 |
| LSU_U4471 | 0.983846 | 1.115022 | 0.93646  | 0.93606643 | ACA1                |
| LSU_U4500 | 1.304395 | 1.150632 | 1.194678 | 1.26369902 | ACA21               |
| LSU_U4521 | 0.648166 | 0.646296 | 0.971855 | 0.98418219 | ACA10               |
| LSU_U4552 | 0.889186 | 0.881244 | 1.02148  | 1.04216277 | ACA27, HBI-6        |
| LSU_U4628 | 0.846721 | 0.924661 | 0.83228  | 0.87010678 | ACA17               |
| LSU_U4636 | 0.758504 | 0.914384 | 0.691882 | 0.7558292  | HBI-61              |
| LSU_U4673 | 0.839703 | 1.000467 | 0.699979 | 0.77795188 | ACA30, ACA37        |
| LSU_U4689 | 0.826632 | 0.912667 | 0.681533 | 0.75717968 | ACA17               |
| LSU_U4972 | 1.209833 | 1.257827 | 1.011026 | 0.90332725 | ACA17               |
| LSU_U4973 | 1.402522 | 1.38188  | 1.060938 | 0.90536153 | ACA43               |
| LSU_U5001 | 0.838449 | 0.88117  | 1.025186 | 0.93655876 | ACA22, ACA33        |
| LSU_U5010 | 0.789932 | 0.900286 | 1.078619 | 0.98056112 | ACA22, U64          |
