# Supplementary material for: Lytic Reactivation of the Kaposi’s Sarcoma-Associated Herpesvirus (KSHV) Is Accompanied by Major Nucleolar Alterations
Source: MDPI journal article supplement (doi:10.3390/v14081720), 2022-08-04
Supplement: s1 [file s1]

## **Supplemental Movie Legends**

### **Movies S1 & S2. UBF colocalizes with viral replication compartments during lytic reactivation.**

3D stacks of BAC16-infected iSLK cells that were treated with Dox and n-Butyrate for 48-hr to induce lytic reactivation. Cells were stained with anti-ORF59 and secondary Rhodamine-conjugated antibody, and subsequently with anti-UBF and anti-Rabbit Cy5-conjugated secondary antibody (Cyan). Chromatin was detected by Hoechst staining. Each Z-stack contains 31 planes at 0.5  $\mu\text{m}$  steps.

**Movie S3. The distribution of UBF and Fibrillarin during lytic induction.** 3D stacks of BAC16-infected iSLK cells that were treated with Dox and n-Butyrate for 48-hr to induce lytic reactivation. Cells were stained with anti-UBF (Cyan), anti-Fibrillarin (Red) and Hoechst (Blue). Each z-stack contains 31 planes at 0.5  $\mu\text{m}$  steps. The distribution of UBF indicates that lytic virus reactivation took place in both cells.

**Movie S4. The distribution of UBF and Nucleolin during lytic induction.** 3D stacks of BAC16-infected iSLK cells that were treated with Dox and n-Butyrate for 48-hr to induce lytic reactivation. Cells were stained with anti-UBF (Red), anti-Nucleolin (Cyan), and Hoechst (Blue). Each z-stack contains 31 planes at 0.5  $\mu\text{m}$  steps. The distribution of UBF indicates that lytic virus reactivation took place in the upper cell only.
