# Supplementary material for: Lytic Reactivation of the Kaposi’s Sarcoma-Associated Herpesvirus (KSHV) Is Accompanied by Major Nucleolar Alterations
Source: Viruses. 2022 Aug 4;14(8):1720. doi: 10.3390/v14081720 (PMC9412354; doi:10.3390/v14081720)
Supplement: Supplementary file 1 [file viruses-14-01720-s001.zip]

Archive with 10 entries (10 files):
- Movie S1-UBF&ORF59.avi
- Movie S2-UBF&ORF59-1.avi
- Movie S3-UBF&Fibrillarin.mp4
- Movie S4-UBF&Nucleolin.mp4
- Supplemental Movie Legends.pdf
- Supplementary Figures and Legends.pdf
- Table S1.pdf
- Table S2.pdf
- Table S3.pdf
- viruses-1794797-Figures-supplementary.pdf
